# Supplementary material for: Detection of ruminant meat and bone meal in feeds by sandwich ELISA with monoclonal antibodies
Source: PubMed Central journal article supplement — J Vet Med Sci. 2015 Jul 12;77(12):1605–9. doi: 10.1292/jvms.15-0078 (PMC4710716; doi:10.1292/jvms.15-0078), 2015-07-12
Supplement: jvms-77-1605-s001.pdf [file jvms-77-1605-s001.pdf]

**Supplementary Table 1.** Assessment of myoglobin content in the model feeds, with or without the addition of meat and bone meal using this ELISA .  
Comparison of the ELISA A450 values between the threshold reference and model feed extracts, using Dunnett's test.

| Model feed                                      | $A_{450}$    |              |              | Mean   | SD     | Difference of mean  |        | 95% confidence level of the difference |             |
|-------------------------------------------------|--------------|--------------|--------------|--------|--------|---------------------|--------|----------------------------------------|-------------|
|                                                 | Experiment 1 | Experiment 2 | Experiment 3 |        |        | $A_{450}$ Threshold | $p$    | Lower limit                            | Upper limit |
| Threshold control                               | 0.1066       | 0.1058       | 0.1071       | 0.1065 | 0.0007 | 0                   | -      | -                                      | -           |
| Assorted feed                                   | 0.0157       | 0.021        | 0.0213       | 0.0193 | 0.0032 | -0.0872*            | 0.0000 | -0.0919                                | -0.0824     |
| + 0.05% MBM*                                    | 0.127        | 0.1225       | 0.146        | 0.1318 | 0.0125 | 0.0253              | 0.0558 | -0.0005                                | 0.0512      |
| + 0.1% MBM                                      | 0.1897       | 0.2057       | 0.247        | 0.2141 | 0.0296 | 0.1076*             | 0.0002 | 0.0551                                 | 0.1601      |
| A 4:1 mixture of assorted feed and skimmed milk | 0.0187       | 0.0203       | 0.02         | 0.0197 | 0.0009 | -0.0868*            | 0.0000 | -0.0916                                | -0.0821     |
| + 0.05% MBM                                     | 0.0865       | 0.094        | 0.112        | 0.0975 | 0.0131 | -0.009              | 0.8097 | -0.0349                                | 0.0169      |
| + 0.1% MBM                                      | 0.1547       | 0.1627       | 0.1973       | 0.1716 | 0.0227 | 0.0651*             | 0.0135 | 0.0125                                 | 0.1176      |
| Fish meal                                       | 0.025        | 0.0277       | 0.0273       | 0.0267 | 0.0015 | -0.0798*            | 0.0000 | -0.0846                                | -0.0751     |
| + 0.05% MBM                                     | 0.0985       | 0.1          | 0.116        | 0.1048 | 0.0097 | -0.0017             | 1.0000 | -0.0275                                | 0.0242      |
| + 0.1% MBM                                      | 0.1917       | 0.2027       | 0.2393       | 0.2112 | 0.025  | 0.1047*             | 0.0002 | 0.0522                                 | 0.1572      |
| Pork meal                                       | 0.0433       | 0.043        | 0.0473       | 0.0446 | 0.0024 | -0.0619*            | 0.0000 | -0.0667                                | -0.0572     |
| + 0.05% MBM                                     | 0.114        | 0.107        | 0.139        | 0.12   | 0.0168 | 0.0135              | 0.4841 | -0.0124                                | 0.0394      |
| + 0.1% MBM                                      | 0.182        | 0.184        | 0.221        | 0.1957 | 0.022  | 0.0892*             | 0.0011 | 0.0366                                 | 0.1417      |
| Pork/chicken meal (1)                           | 0.0323       | 0.0343       | 0.037        | 0.0346 | 0.0023 | -0.0719*            | 0.0000 | -0.0767                                | -0.0672     |
| + 0.05% MBM                                     | 0.1195       | 0.123        | 0.1355       | 0.126  | 0.0084 | 0.0195              | 0.1777 | -0.0064                                | 0.0454      |
| + 0.1% MBM                                      | 0.1937       | 0.2067       | 0.238        | 0.2128 | 0.0228 | 0.1063*             | 0.0002 | 0.0538                                 | 0.1588      |
| Pork/chicken meal (2)                           | 0.0213       | 0.0233       | 0.0247       | 0.0231 | 0.0017 | -0.0834*            | 0.0000 | -0.0881                                | -0.0787     |
| + 0.05% MBM                                     | 0.0825       | 0.0815       | 0.0945       | 0.0862 | 0.0072 | -0.0203             | 0.1518 | -0.0462                                | 0.0055      |
| + 0.1% MBM                                      | 0.1813       | 0.1907       | 0.2197       | 0.1972 | 0.02   | 0.0907*             | 0.0009 | 0.0382                                 | 0.1432      |

\*MBM: meal and bone meal
